# Supplementary material for: Nucleation control and separation of ethyl maltol polymorphs under different growth conditions through solution crystallization process in selected solvent environments
Source: Royal Society of Chemistry journal article supplement (doi:10.1039/d3ce01154b), 2024-01-01
Supplement: d3ce01154b1.pdf [file d3ce01154b1.pdf]

## Supplementary Information

### Nucleation Control and Separation of Ethyl Maltol Polymorphs under Different Growth Conditions through Solution Crystallization Process in Selected Solvent Environments

Anitha Thirumalaisamy and Srinivasan Karuppanan\*

Crystal Growth Laboratory, Department of Physics, School of Physical Sciences, Bharathiar University, Coimbatore 641 046,  
Tamil Nadu, India.

Email: [nivas\\_5@yahoo.com](mailto:nivas_5@yahoo.com)

Single Crystal X-ray diffraction (SCXRD) data on Form-I, Form-II, and Form-III polymorphs of ethyl maltol (Table S1 to S18).

**Table S1.** Non-hydrogen atoms with anisotropic atomic displacement parameters ( $\text{\AA}^2$ ) for Form-I polymorph

|    | $U_{11}$   | $U_{22}$   | $U_{33}$   | $U_{23}$    | $U_{13}$    | $U_{12}$    |
|----|------------|------------|------------|-------------|-------------|-------------|
| O1 | 0.0511(13) | 0.0457(13) | 0.0431(13) | 0.0000(11)  | 0.0118(10)  | -0.0042(11) |
| O2 | 0.0569(14) | 0.0407(12) | 0.0507(14) | -0.0002(11) | 0.0219(11)  | 0.0009(11)  |
| O3 | 0.0708(16) | 0.0350(12) | 0.0480(15) | -0.0042(11) | 0.0192(12)  | -0.0083(12) |
| C4 | 0.0404(18) | 0.0306(17) | 0.0311(17) | 0.0016(13)  | 0.0034(15)  | 0.0022(14)  |
| C3 | 0.0362(18) | 0.0349(17) | 0.0308(17) | 0.0078(14)  | -0.0016(15) | 0.0051(15)  |
| C5 | 0.0434(19) | 0.0336(17) | 0.0329(17) | 0.0006(15)  | 0.0028(15)  | 0.0028(15)  |
| C2 | 0.049(2)   | 0.0315(16) | 0.0391(19) | -0.0042(14) | 0.0038(16)  | 0.0042(15)  |
| C1 | 0.059(2)   | 0.0367(18) | 0.048(2)   | -0.0032(17) | 0.0019(18)  | -0.0076(16) |
| C6 | 0.052(2)   | 0.052(2)   | 0.047(2)   | -0.0039(16) | 0.0131(17)  | 0.0106(17)  |
| C7 | 0.092(3)   | 0.058(2)   | 0.045(2)   | -0.0065(18) | 0.015(2)    | 0.002(2)    |

**Table S2.** Hydrogen atomic coordinates and isotropic atomic displacement parameters ( $\text{\AA}^2$ ) for Form-I Polymorph

|     | x/a    | y/b    | z/c    | U(eq) |
|-----|--------|--------|--------|-------|
| H3  | 0.3506 | 0.1255 | 0.6939 | 0.076 |
| H2  | 0.5809 | 0.7525 | 0.7190 | 0.048 |
| H1  | 0.8981 | 0.7768 | 0.6462 | 0.058 |
| H6A | 0.7566 | 0.0697 | 0.5746 | 0.06  |
| H6B | 1.0123 | 0.1991 | 0.5623 | 0.06  |
| H7A | 0.4883 | 0.2392 | 0.4919 | 0.097 |
| H7B | 0.7470 | 0.1492 | 0.4622 | 0.097 |
| H7C | 0.7423 | 0.3710 | 0.4799 | 0.097 |

**Table S3.** Atomic coordinates and equivalent isotropic atomic displacement Parameters ( $\text{\AA}^2$ ) for Form-I polymorph

|    | x/a       | y/b       | z/c         | U(eq)      |
|----|-----------|-----------|-------------|------------|
| O1 | 0.8659(4) | 0.5143(3) | 0.60844(10) | 0.0462(6)  |
| O2 | 0.3071(4) | 0.4387(3) | 0.74249(11) | 0.0484(6)  |
| O3 | 0.4224(5) | 0.1370(3) | 0.65887(10) | 0.0504(7)  |
| C4 | 0.5477(6) | 0.3127(4) | 0.65726(13) | 0.0340(7)  |
| C3 | 0.4762(6) | 0.4662(4) | 0.70131(14) | 0.0342(7)  |
| C5 | 0.7323(6) | 0.3398(4) | 0.61284(14) | 0.0367(8)  |
| C2 | 0.6187(6) | 0.6453(4) | 0.69321(14) | 0.0400(8)  |
| C1 | 0.8048(7) | 0.6595(4) | 0.64908(15) | 0.0480(9)  |
| C6 | 0.8127(7) | 0.1991(4) | 0.56224(14) | 0.0497(9)  |
| C7 | 0.6860(8) | 0.2437(5) | 0.49273(15) | 0.0649(11) |

**Table S4.** Bond lengths (Å) for Form-I polymorph

|        |          |        |          |
|--------|----------|--------|----------|
| O1-C1  | 1.343(3) | O1-C5  | 1.372(3) |
| O2-C3  | 1.235(3) | O3-C4  | 1.355(3) |
| O3-H3  | 0.82     | C4-C5  | 1.337(4) |
| C4-C3  | 1.442(4) | C3-C2  | 1.430(4) |
| C5-C6  | 1.484(4) | C2-C1  | 1.329(4) |
| C2-H2  | 0.93     | C1-H1  | 0.93     |
| C6-C7  | 1.511(4) | C6-H6A | 0.97     |
| C6-H6B | 0.97     | C7-H7A | 0.96     |
| C7-H7B | 0.96     | C7-H7C | 0.96     |

**Table S5.** Bond angles (°) for Form-I polymorph

|            |          |            |          |
|------------|----------|------------|----------|
| C1-O1-C5   | 118.7(2) | C4-O3-H3   | 109.5    |
| C5-C4-O3   | 118.1(2) | C5-C4-C3   | 121.6(3) |
| O3-C4-C3   | 120.3(2) | O2-C3-C2   | 124.5(3) |
| O2-C3-C4   | 121.0(3) | C2-C3-C4   | 114.5(3) |
| C4-C5-O1   | 121.0(2) | C4-C5-C6   | 127.2(3) |
| O1-C5-C6   | 111.8(2) | C1-C2-C3   | 120.4(3) |
| C1-C2-H2   | 119.8    | C3-C2-H2   | 119.8    |
| C2-C1-O1   | 123.8(3) | C2-C1-H1   | 118.1    |
| O1-C1-H1   | 118.1    | C5-C6-C7   | 113.3(2) |
| C5-C6-H6A  | 108.9    | C7-C6-H6A  | 108.9    |
| C5-C6-H6B  | 108.9    | C7-C6-H6B  | 108.9    |
| H6A-C6-H6B | 107.7    | C6-C7-H7A  | 109.5    |
| C6-C7-H7B  | 109.5    | H7A-C7-H7B | 109.5    |
| C6-C7-H7C  | 109.5    | H7A-C7-H7C | 109.5    |

|            |       |  |  |
|------------|-------|--|--|
| H7B-C7-H7C | 109.5 |  |  |
|------------|-------|--|--|

**Table S6.** Torsion angles (°) for Form-I polymorph

|             |           |             |           |
|-------------|-----------|-------------|-----------|
| C5-C4-C3-O2 | -179.4(3) | O3-C4-C3-O2 | 2.3(4)    |
| C5-C4-C3-C2 | -0.2(4)   | O3-C4-C3-C2 | -178.5(3) |
| O3-C4-C5-O1 | 179.8(2)  | C3-C4-C5-O1 | 1.4(4)    |
| O3-C4-C5-C6 | 2.1(4)    | C3-C4-C5-C6 | -176.2(3) |
| C1-O1-C5-C4 | -1.0(4)   | C1-O1-C5-C6 | 177.0(2)  |
| O2-C3-C2-C1 | 177.6(3)  | C4-C3-C2-C1 | -1.6(4)   |
| C3-C2-C1-O1 | 2.1(5)    | C5-O1-C1-C2 | -0.8(4)   |
| C4-C5-C6-C7 | 103.4(4)  | O1-C5-C6-C7 | -74.4(3)  |

**Table S7.** Non-hydrogen atoms with anisotropic atomic displacement parameters ( $\text{\AA}^2$ ) for Form-II polymorph

|    | $U_{11}$  | $U_{22}$  | $U_{33}$  | $U_{23}$   | $U_{13}$   | $U_{12}$  |
|----|-----------|-----------|-----------|------------|------------|-----------|
| O3 | 0.0353(4) | 0.0359(4) | 0.0718(6) | -0.0161(4) | -0.0119(4) | 0.0193(3) |
| O1 | 0.0525(5) | 0.0348(4) | 0.0544(5) | -0.0040(3) | -0.0062(4) | 0.0261(4) |
| O2 | 0.0379(4) | 0.0400(5) | 0.0704(6) | -0.0001(4) | -0.0079(4) | 0.0228(4) |
| C2 | 0.0287(5) | 0.0304(5) | 0.0367(5) | 0.0000(4)  | 0.0026(4)  | 0.0138(4) |
| C1 | 0.0285(5) | 0.0329(5) | 0.0377(5) | 0.0040(4)  | 0.0040(4)  | 0.0145(4) |
| C3 | 0.0371(5) | 0.0350(5) | 0.0357(5) | 0.0006(4)  | 0.0012(4)  | 0.0196(4) |
| C5 | 0.0339(5) | 0.0363(5) | 0.0416(6) | -0.0021(4) | -0.0029(4) | 0.0125(4) |
| C6 | 0.0478(7) | 0.0504(7) | 0.0469(6) | 0.0004(5)  | -0.0065(5) | 0.0312(6) |
| C4 | 0.0457(6) | 0.0329(5) | 0.0504(7) | -0.0068(5) | -0.0041(5) | 0.0151(5) |

|    |           |           |           |           |           |           |
|----|-----------|-----------|-----------|-----------|-----------|-----------|
| C7 | 0.0476(7) | 0.0699(9) | 0.0747(9) | 0.0146(7) | 0.0054(6) | 0.0369(7) |
|----|-----------|-----------|-----------|-----------|-----------|-----------|

**Table S8.** Hydrogen atomic coordinates and isotropic atomic displacement parameters ( $\text{\AA}^2$ ) for Form-II Polymorph

|     | x/a    | y/b    | z/c    | U(eq) |
|-----|--------|--------|--------|-------|
| H3  | 0.5734 | 0.6699 | 0.3801 | 0.07  |
| H5  | 0.7304 | 0.8657 | 0.6909 | 0.047 |
| H6A | 0.4771 | 0.7457 | 0.2806 | 0.054 |
| H6B | 0.5089 | 0.8310 | 0.2674 | 0.054 |
| H4  | 0.6837 | 0.9395 | 0.6495 | 0.054 |
| H7A | 0.4184 | 0.7418 | 0.5336 | 0.091 |
| H7B | 0.3945 | 0.7794 | 0.3953 | 0.091 |
| H7C | 0.4535 | 0.8277 | 0.5314 | 0.091 |

**Table S9.** Atomic coordinates and equivalent isotropic atomic displacement Parameters ( $\text{\AA}^2$ ) for Form-II polymorph

|    | x/a        | y/b        | z/c         | U(eq)     |
|----|------------|------------|-------------|-----------|
| O3 | 0.54633(4) | 0.68699(4) | 0.39718(12) | 0.0470(3) |
| O1 | 0.59834(5) | 0.87239(4) | 0.51082(11) | 0.0453(2) |
| O2 | 0.67413(4) | 0.73064(4) | 0.58150(12) | 0.0479(3) |
| C2 | 0.58598(5) | 0.75526(5) | 0.46398(13) | 0.0323(2) |
| C1 | 0.65185(5) | 0.77502(5) | 0.56092(13) | 0.0334(2) |
| C3 | 0.56209(6) | 0.80376(6) | 0.44108(13) | 0.0352(3) |
| C5 | 0.68730(6) | 0.84860(6) | 0.62813(14) | 0.0395(3) |
| C6 | 0.49551(7) | 0.79072(7) | 0.34614(16) | 0.0454(3) |
| C4 | 0.65956(7) | 0.89260(6) | 0.60217(16) | 0.0450(3) |
| C7 | 0.43492(8) | 0.78433(9) | 0.4622(2)   | 0.0607(4) |

**Table S10.** Bond lengths (Å) for Form-II polymorph

|        |            |        |            |
|--------|------------|--------|------------|
| O3-C2  | 1.3515(12) | O3-H3  | 0.82       |
| O1-C4  | 1.3423(15) | O1-C3  | 1.3624(13) |
| O2-C1  | 1.2427(13) | C2-C3  | 1.3512(14) |
| C2-C1  | 1.4459(14) | C1-C5  | 1.4373(14) |
| C3-C6  | 1.4837(15) | C5-C4  | 1.3293(17) |
| C5-H5  | 0.93       | C6-C7  | 1.5162(19) |
| C6-H6A | 0.97       | C6-H6B | 0.97       |
| C4-H4  | 0.93       | C7-H7A | 0.96       |
| C7-H7B | 0.96       | C7-H7C | 0.96       |

**Table S11.** Bond angles (°) for Form-II polymorph

|           |            |            |            |
|-----------|------------|------------|------------|
| C2-O3-H3  | 109.5      | C4-O1-C3   | 119.36(9)  |
| C3-C2-O3  | 118.78(9)  | C3-C2-C1   | 121.01(9)  |
| O3-C2-C1  | 120.19(9)  | O2-C1-C5   | 124.68(10) |
| O2-C1-C2  | 121.14(9)  | C5-C1-C2   | 114.18(9)  |
| C2-C3-O1  | 121.31(10) | C2-C3-C6   | 126.67(10) |
| O1-C3-C6  | 112.01(9)  | C4-C5-C1   | 121.13(10) |
| C4-C5-H5  | 119.4      | C1-C5-H5   | 119.4      |
| C3-C6-C7  | 112.38(11) | C3-C6-H6A  | 109.1      |
| C7-C6-H6A | 109.1      | C3-C6-H6B  | 109.1      |
| C7-C6-H6B | 109.1      | H6A-C6-H6B | 107.9      |
| C5-C4-O1  | 122.99(10) | C5-C4-H4   | 118.5      |
| O1-C4-H4  | 118.5      | C6-C7-H7A  | 109.5      |
| C6-C7-H7B | 109.5      | H7A-C7-H7B | 109.5      |

|            |       |            |       |
|------------|-------|------------|-------|
| C6-C7-H7C  | 109.5 | H7A-C7-H7C | 109.5 |
| H7B-C7-H7C | 109.5 |            |       |

**Table S12.** Torsion angles (°) for Form-II polymorph

|             |             |             |             |
|-------------|-------------|-------------|-------------|
| C3-C2-C1-O2 | -179.66(10) | O3-C2-C1-O2 | 1.62(15)    |
| C3-C2-C1-C5 | 0.33(14)    | O3-C2-C1-C5 | -178.38(9)  |
| O3-C2-C3-O1 | 177.55(9)   | C1-C2-C3-O1 | -1.18(15)   |
| O3-C2-C3-C6 | -0.78(17)   | C1-C2-C3-C6 | -179.52(10) |
| C4-O1-C3-C2 | 0.91(16)    | C4-O1-C3-C6 | 179.47(10)  |
| O2-C1-C5-C4 | -179.22(11) | C2-C1-C5-C4 | 0.78(15)    |
| C2-C3-C6-C7 | 108.44(14)  | O1-C3-C6-C7 | -70.03(13)  |
| C1-C5-C4-O1 | -1.11(18)   | C3-O1-C4-C5 | 0.25(17)    |

**Table S13.** Non-hydrogen atoms with anisotropic atomic displacement parameters ( $\text{\AA}^2$ ) for Form-III polymorph

|    | $U_{11}$   | $U_{22}$   | $U_{33}$   | $U_{23}$   | $U_{13}$   | $U_{12}$   |
|----|------------|------------|------------|------------|------------|------------|
| O1 | 0.0483(7)  | 0.0986(10) | 0.0488(7)  | -0.0272(7) | -0.0153(5) | -0.0217(6) |
| O3 | 0.0503(7)  | 0.0777(8)  | 0.0501(7)  | -0.0225(6) | -0.0100(5) | -0.0143(6) |
| O2 | 0.0546(7)  | 0.0954(10) | 0.0449(7)  | -0.0169(6) | -0.0178(5) | -0.0188(6) |
| C1 | 0.0455(8)  | 0.0566(9)  | 0.0510(9)  | -0.0255(7) | -0.0155(7) | -0.0024(7) |
| C2 | 0.0409(8)  | 0.0533(9)  | 0.0479(8)  | -0.0227(7) | -0.0154(6) | -0.0035(6) |
| C3 | 0.0438(8)  | 0.0505(9)  | 0.0487(9)  | -0.0201(7) | -0.0185(7) | -0.0020(6) |
| C4 | 0.0467(9)  | 0.0621(10) | 0.0589(10) | -0.0244(8) | -0.0243(7) | -0.0042(7) |
| C6 | 0.0622(11) | 0.0774(12) | 0.0481(9)  | -0.0281(8) | -0.0173(8) | -0.0086(9) |
| C5 | 0.0438(9)  | 0.0782(12) | 0.0654(11) | -0.0279(9) | -0.0165(8) | -0.0127(8) |

|    |            |            |            |             |             |             |
|----|------------|------------|------------|-------------|-------------|-------------|
| C7 | 0.0882(14) | 0.0794(14) | 0.0706(13) | -0.0165(10) | -0.0409(11) | -0.0076(11) |
|----|------------|------------|------------|-------------|-------------|-------------|

**Table S14.** Hydrogen atomic coordinates and isotropic atomic displacement parameters ( $\text{\AA}^2$ ) for Form-III Polymorph

|     | x/a     | y/b    | z/c    | U(eq) |
|-----|---------|--------|--------|-------|
| H1  | -0.0019 | 0.0600 | 0.7938 | 0.095 |
| H4  | 0.5924  | 0.1567 | 0.7802 | 0.064 |
| H6A | 0.1516  | 0.2161 | 0.2767 | 0.073 |
| H6B | 0.3611  | 0.2926 | 0.1187 | 0.073 |
| H5  | 0.7419  | 0.3044 | 0.4421 | 0.074 |
| H7A | 0.0486  | 0.5295 | 0.2794 | 0.12  |
| H7B | 0.1085  | 0.5484 | 0.0536 | 0.12  |
| H7C | 0.2580  | 0.6060 | 0.1220 | 0.12  |

**Table S15.** Atomic coordinates and equivalent isotropic atomic displacement Parameters ( $\text{\AA}^2$ ) for Form-III polymorph

|    | x/a         | y/b         | z/c         | U(eq)     |
|----|-------------|-------------|-------------|-----------|
| O1 | 0.04608(17) | 0.1032(2)   | 0.66783(17) | 0.0636(4) |
| O3 | 0.52265(17) | 0.30608(18) | 0.34480(17) | 0.0611(4) |
| O2 | 0.22952(18) | 0.0360(2)   | 0.95314(17) | 0.0669(4) |
| C1 | 0.3323(2)   | 0.2495(2)   | 0.4085(2)   | 0.0498(4) |
| C2 | 0.2331(2)   | 0.1591(2)   | 0.6107(2)   | 0.0462(4) |
| C3 | 0.3227(2)   | 0.1186(2)   | 0.7675(2)   | 0.0469(4) |
| C4 | 0.5233(2)   | 0.1792(2)   | 0.6890(3)   | 0.0537(4) |
| C6 | 0.2521(3)   | 0.3060(3)   | 0.2342(3)   | 0.0610(5) |
| C5 | 0.6112(3)   | 0.2672(3)   | 0.4876(3)   | 0.0619(5) |
| C7 | 0.1583(3)   | 0.5165(3)   | 0.1661(3)   | 0.0801(6) |



**Table S16.** Bond lengths (Å) for Form-III polymorph

|        |            |        |            |
|--------|------------|--------|------------|
| O1-C2  | 1.3490(18) | O1-H1  | 0.82       |
| O3-C5  | 1.346(2)   | O3-C1  | 1.3641(19) |
| O2-C3  | 1.2374(19) | C1-C2  | 1.344(2)   |
| C1-C6  | 1.489(2)   | C2-C3  | 1.442(2)   |
| C3-C4  | 1.430(2)   | C4-C5  | 1.322(2)   |
| C4-H4  | 0.93       | C6-C7  | 1.506(3)   |
| C6-H6A | 0.97       | C6-H6B | 0.97       |
| C5-H5  | 0.93       | C7-H7A | 0.96       |
| C7-H7B | 0.96       | C7-H7C | 0.96       |

**Table S17.** Bond angles (°) for Form-III polymorph

|           |            |            |            |
|-----------|------------|------------|------------|
| C2-O1-H1  | 109.5      | C5-O3-C1   | 118.95(13) |
| C2-C1-O3  | 120.71(14) | C2-C1-C6   | 126.25(15) |
| O3-C1-C6  | 113.00(14) | C1-C2-O1   | 119.01(13) |
| C1-C2-C3  | 121.64(14) | O1-C2-C3   | 119.35(13) |
| O2-C3-C4  | 124.49(14) | O2-C3-C2   | 121.05(14) |
| C4-C3-C2  | 114.47(14) | C5-C4-C3   | 120.40(15) |
| C5-C4-H4  | 119.8      | C3-C4-H4   | 119.8      |
| C1-C6-C7  | 111.51(15) | C1-C6-H6A  | 109.3      |
| C7-C6-H6A | 109.3      | C1-C6-H6B  | 109.3      |
| C7-C6-H6B | 109.3      | H6A-C6-H6B | 108.0      |
| C4-C5-O3  | 123.82(15) | C4-C5-H5   | 118.1      |
| O3-C5-H5  | 118.1      | C6-C7-H7A  | 109.5      |
| C6-C7-H7B | 109.5      | H7A-C7-H7B | 109.5      |

|            |       |            |       |
|------------|-------|------------|-------|
| C6-C7-H7C  | 109.5 | H7A-C7-H7C | 109.5 |
| H7B-C7-H7C | 109.5 |            |       |

**Table S18.** Torsion angles (°) for Form-III polymorph

|             |             |             |             |
|-------------|-------------|-------------|-------------|
| C5-O3-C1-C2 | 1.0(2)      | C5-O3-C1-C6 | 178.75(15)  |
| O3-C1-C2-O1 | -179.21(14) | C6-C1-C2-O1 | 3.4(3)      |
| O3-C1-C2-C3 | 0.1(2)      | C6-C1-C2-C3 | -177.36(15) |
| C1-C2-C3-O2 | 179.71(16)  | O1-C2-C3-O2 | -1.0(2)     |
| C1-C2-C3-C4 | -1.0(2)     | O1-C2-C3-C4 | 178.29(14)  |
| O2-C3-C4-C5 | -179.85(17) | C2-C3-C4-C5 | 0.9(2)      |
| C2-C1-C6-C7 | 92.9(2)     | O3-C1-C6-C7 | -84.66(18)  |
| C3-C4-C5-O3 | 0.2(3)      | C1-O3-C5-C4 | -1.1(3)     |
